# Supplementary material
Source: ML conference proceedings conference paper supplement (https://openreview.net/forum?id=jLLF5EbwI2)
Supplement: supplementary_material [file attachment]

## Sheet: multi_obj
Image Name	Results			Errors
	0	0.5	1		Total:	118
0_0_white_a knife above a toaster.a cake to the right of a toaster..png	FALSE	FALSE	TRUE
0_3_white_a tie above a toothbrush.a spoon to the right of a toothbrush..png	TRUE	FALSE	FALSE
0_7_white_a cat above a kite.a clock to the right of a kite..png	FALSE	TRUE	FALSE
0_11_white_a laptop below an airplane.a laptop to the left of a cow..png	FALSE	FALSE	TRUE
0_15_white_a cat below a sheep.a train to the right of a cat..png	TRUE	FALSE	FALSE
0_16_white_a dining table below a snowboard.a dining table to the left of a sandwich..png	FALSE	FALSE	TRUE
0_27_real_indoors_a tennis racket above a teddy bear.a teddy bear to the left of a cow..png	FALSE	TRUE	FALSE
0_31_real_indoors_a handbag above a bus.a bus to the left of a stop sign..png	FALSE	FALSE	TRUE
0_36_real_indoors_a tv below a hair drier.a tv to the left of a tie..png	FALSE	TRUE	FALSE
0_39_real_indoors_a toilet below a baseball bat.a toilet to the left of a frisbee..png	FALSE	TRUE	FALSE
0_43_real_indoors_a remote below a microwave.a remote to the left of a donut..png	TRUE	FALSE	FALSE
0_44_real_indoors_a motorcycle below a skateboard.a remote to the right of a motorcycle..png	FALSE	FALSE	TRUE
0_45_real_indoors_a bear above a surfboard.a surfboard to the left of a sports ball..png	TRUE	FALSE	FALSE
0_48_real_indoors_a fork above a refrigerator.a refrigerator to the left of an umbrella..png	TRUE	FALSE	FALSE
0_49_real_indoors_a cow above a handbag.a handbag to the left of a book..png	FALSE	TRUE	FALSE
0_77_real_outdoors_a wine glass above a cake.a book to the right of a cake..png	FALSE	FALSE	TRUE
0_81_real_outdoors_a truck below a pizza.a fire hydrant to the right of a truck..png	TRUE	FALSE	FALSE
0_90_real_outdoors_a carrot below a bus.a handbag to the right of a carrot..png	FALSE	TRUE	FALSE
0_96_real_outdoors_a person below a spoon.a frisbee to the right of a person..png	TRUE	FALSE	FALSE
0_107_real_outdoors_a laptop below a broccoli.a broccoli to the left of a bowl..png	TRUE	FALSE	FALSE
0_111_real_outdoors_a kite below a cell phone.a skateboard to the right of a cell phone..png	TRUE	FALSE	FALSE
0_113_real_outdoors_a cake below a sink.a keyboard to the right of a sink..png	TRUE	FALSE	FALSE
0_120_real_outdoors_a pizza above a sports ball.a snowboard to the right of a pizza..png	FALSE	FALSE	TRUE
0_121_real_outdoors_a cell phone below a baseball bat.a baseball bat to the left of an apple..png	TRUE	FALSE	FALSE
0_143_real_indoors_an oven above a snowboard.a kite to the right of an oven..png	FALSE	FALSE	TRUE
0_150_real_outdoors_an oven above a teddy bear.a backpack to the left of a teddy bear..png	FALSE	TRUE	FALSE
0_151_real_outdoors_a toaster above a mouse.a mouse to the right of a carrot..png	FALSE	FALSE	TRUE
0_160_real_outdoors_a traffic light above an airplane.an airplane to the right of a person..png	FALSE	TRUE	FALSE
0_165_real_outdoors_a hot dog below a dining table.a laptop to the left of a hot dog..png	FALSE	FALSE	TRUE
0_168_real_outdoors_a sheep below a handbag.a sheep to the right of an orange..png	TRUE	FALSE	FALSE
0_170_real_outdoors_a cup above a toaster.a skis to the left of a toaster..png	FALSE	FALSE	TRUE
0_177_real_indoors_an airplane below a car.a parking meter to the left of an airplane..png	FALSE	FALSE	TRUE
0_190_real_indoors_a vase below a dog.a bottle to the left of a vase..png	FALSE	FALSE	TRUE
0_196_real_indoors_a sheep below a toothbrush.a sheep to the right of an apple..png	FALSE	FALSE	TRUE
0_216_real_indoors_a clock above a cell phone.a clock to the right of a bus..png	FALSE	TRUE	FALSE
0_217_real_indoors_a boat below a pizza.a pizza to the right of a skateboard..png	FALSE	TRUE	FALSE
0_223_real_indoors_a boat below a train.a train to the right of a sandwich..png	TRUE	FALSE	FALSE
0_228_white_a pizza above a horse.a broccoli to the left of a pizza..png	FALSE	FALSE	TRUE
0_229_white_a toilet below a sandwich.a banana to the left of a sandwich..png	FALSE	TRUE	FALSE
0_234_white_a bus above a knife.a bus to the right of a snowboard..png	FALSE	TRUE	FALSE
0_236_white_a donut below a horse.a horse to the right of a giraffe..png	TRUE	FALSE	FALSE
0_240_white_a dog below a sink.a tie to the left of a sink..png	TRUE	FALSE	FALSE
0_244_white_a book below a chair.an orange to the left of a chair..png	FALSE	FALSE	TRUE
0_252_white_a wine glass above a skis.a wine glass to the left of a broccoli..png	FALSE	TRUE	FALSE
0_253_white_an elephant below a refrigerator.a refrigerator to the left of a train..png	TRUE	FALSE	FALSE
0_263_white_a cup above a tennis racket.a cup to the left of a train..png	FALSE	TRUE	FALSE
0_276_real_outdoors_a broccoli above a bottle.a broccoli to the right of a carrot..png	FALSE	TRUE	FALSE
0_278_real_outdoors_a knife below a potted plant.a tie to the left of a potted plant..png	FALSE	TRUE	FALSE
0_287_real_outdoors_a fork above a laptop.a fork to the right of a cat..png	TRUE	FALSE	FALSE
0_289_real_outdoors_a toaster above a cat.a toaster to the right of a mouse..png	FALSE	TRUE	FALSE
1_2_white_an oven above a sports ball.an elephant to the right of a sports ball..png	FALSE	TRUE	FALSE
1_5_white_a cake above a suitcase.a teddy bear to the right of a suitcase..png	FALSE	FALSE	TRUE
1_11_white_a laptop below an airplane.a laptop to the left of a cow..png	FALSE	FALSE	TRUE
1_15_white_a cat below a sheep.a train to the right of a cat..png	TRUE	FALSE	FALSE
1_25_real_indoors_a snowboard below a handbag.a snowboard to the left of a broccoli..png	FALSE	FALSE	TRUE
1_28_real_indoors_a bowl below an airplane.a hot dog to the right of a bowl..png	FALSE	TRUE	FALSE
1_33_real_indoors_an apple above a bus.a bus to the left of a refrigerator..png	FALSE	TRUE	FALSE
1_39_real_indoors_a toilet below a baseball bat.a toilet to the left of a frisbee..png	TRUE	FALSE	FALSE
1_40_real_indoors_a hair drier below a bear.a bench to the right of a hair drier..png	FALSE	TRUE	FALSE
1_48_real_indoors_a fork above a refrigerator.a refrigerator to the left of an umbrella..png	TRUE	FALSE	FALSE
1_54_white_a hot dog below a potted plant.a hot dog to the right of a skis..png	FALSE	FALSE	TRUE
1_61_white_a broccoli below a skis.a broccoli to the right of a tv..png	FALSE	FALSE	TRUE
1_64_white_a microwave above a fire hydrant.a toaster to the left of a fire hydrant..png	FALSE	FALSE	TRUE
1_66_white_a sports ball above a wine glass.a wine glass to the right of a toothbrush..png	FALSE	TRUE	FALSE
1_72_white_a carrot below a skis.a carrot to the right of a parking meter..png	FALSE	FALSE	TRUE
1_73_white_an elephant below a hot dog.an elephant to the right of a suitcase..png	TRUE	FALSE	FALSE
1_81_real_outdoors_a truck below a pizza.a fire hydrant to the right of a truck..png	TRUE	FALSE	FALSE
1_93_real_outdoors_a dining table above an umbrella.a potted plant to the right of an umbrella..png	FALSE	TRUE	FALSE
1_98_real_outdoors_a refrigerator above a vase.a parking meter to the right of a vase..png	FALSE	TRUE	FALSE
1_101_real_outdoors_a cow above a bear.a dog to the right of a cow..png	FALSE	FALSE	TRUE
1_111_real_outdoors_a kite below a cell phone.a skateboard to the right of a cell phone..png	TRUE	FALSE	FALSE
1_113_real_outdoors_a cake below a sink.a keyboard to the right of a sink..png	TRUE	FALSE	FALSE
1_121_real_outdoors_a cell phone below a baseball bat.a baseball bat to the left of an apple..png	FALSE	TRUE	FALSE
1_123_real_outdoors_a vase below a toilet.a chair to the right of a toilet..png	FALSE	TRUE	FALSE
1_124_real_outdoors_an apple below a tennis racket.a tennis racket to the left of a bear..png	FALSE	FALSE	TRUE
1_143_real_indoors_an oven above a snowboard.a kite to the right of an oven..png	FALSE	TRUE	FALSE
1_153_real_outdoors_a toilet above a tv.a book to the left of a tv..png	FALSE	FALSE	TRUE
1_157_real_outdoors_an airplane above a book.a book to the right of a broccoli..png	FALSE	FALSE	TRUE
1_164_real_outdoors_a bus above a giraffe.a sink to the left of a giraffe..png	FALSE	FALSE	TRUE
1_173_real_outdoors_a horse below a mouse.a horse to the right of a bicycle..png	FALSE	TRUE	FALSE
1_174_real_outdoors_a cow below a couch.a cow to the right of a tennis racket..png	FALSE	FALSE	TRUE
1_176_real_indoors_a carrot below a broccoli.a handbag to the left of a carrot..png	FALSE	FALSE	TRUE
1_189_real_indoors_a tennis racket below a mouse.a tennis racket to the right of a giraffe..png	TRUE	FALSE	FALSE
1_200_real_indoors_a toilet above a baseball glove.a toilet to the right of a microwave..png	FALSE	TRUE	FALSE
1_201_real_indoors_a train below a clock.a tennis racket to the left of a clock..png	TRUE	FALSE	FALSE
1_211_real_indoors_a bicycle above a tv.a bird to the left of a bicycle..png	TRUE	FALSE	FALSE
1_214_real_indoors_a banana above a baseball glove.an umbrella to the left of a banana..png	TRUE	FALSE	FALSE
1_218_real_indoors_an oven below a chair.a chair to the right of a donut..png	TRUE	FALSE	FALSE
1_220_real_indoors_a toaster below a chair.a chair to the right of an elephant..png	FALSE	TRUE	FALSE
1_226_white_a horse below a bus.a bus to the right of a tennis racket..png	FALSE	TRUE	FALSE
1_229_white_a toilet below a sandwich.a banana to the left of a sandwich..png	FALSE	TRUE	FALSE
1_231_white_a traffic light below a clock.a clock to the right of an airplane..png	FALSE	TRUE	FALSE
1_239_white_a cake below a dining table.a remote to the left of a dining table..png	TRUE	FALSE	FALSE
1_243_white_a laptop below a potted plant.a potted plant to the right of a baseball glove..png	FALSE	FALSE	TRUE
1_245_white_an elephant below a car.an airplane to the left of a car..png	FALSE	FALSE	TRUE
1_246_white_a vase above a spoon.a vase to the right of a microwave..png	FALSE	TRUE	FALSE
1_251_white_a potted plant below an elephant.an elephant to the left of a kite..png	TRUE	FALSE	FALSE
1_255_white_a toilet below a horse.a horse to the left of a spoon..png	TRUE	FALSE	FALSE
1_265_white_an umbrella below a frisbee.a frisbee to the left of a chair..png	TRUE	FALSE	FALSE
1_269_white_a wine glass above a tennis racket.a wine glass to the left of a frisbee..png	FALSE	TRUE	FALSE
1_272_white_a mouse above a tie.a parking meter to the right of a mouse..png	FALSE	TRUE	FALSE
1_274_white_a sports ball above a bottle.a sports ball to the left of a surfboard..png	FALSE	FALSE	TRUE
1_276_real_outdoors_a broccoli above a bottle.a broccoli to the right of a carrot..png	FALSE	TRUE	FALSE
1_281_real_outdoors_a sink below a snowboard.a parking meter to the left of a snowboard..png	FALSE	TRUE	FALSE
1_285_real_outdoors_a parking meter above an apple.a kite to the left of a parking meter..png	FALSE	TRUE	FALSE
1_295_real_outdoors_a scissors above an airplane.a book to the left of a scissors..png	TRUE	FALSE	FALSE
1_298_real_outdoors_a bird below a microwave.a microwave to the right of a suitcase..png	FALSE	TRUE	FALSE
2_6_white_a person above a tennis racket.a sink to the right of a tennis racket..png	FALSE	TRUE	FALSE
2_21_white_a fire hydrant above a bed.a sandwich to the right of a bed..png	FALSE	TRUE	FALSE
2_39_real_indoors_a toilet below a baseball bat.a toilet to the left of a frisbee..png	FALSE	TRUE	FALSE
2_42_real_indoors_a knife above a cake.a cake to the left of an apple..png	TRUE	FALSE	FALSE
2_62_white_a handbag above a skis.a tennis racket to the left of a skis..png	FALSE	FALSE	TRUE
2_69_white_a truck above a broccoli.a broccoli to the right of a dog..png	FALSE	FALSE	TRUE
2_71_white_a sheep above a suitcase.a suitcase to the right of a cell phone..png	FALSE	FALSE	TRUE
2_72_white_a carrot below a skis.a carrot to the right of a parking meter..png	FALSE	FALSE	TRUE
2_95_real_outdoors_a banana below a book.a sandwich to the right of a banana..png	FALSE	TRUE	FALSE
2_100_real_outdoors_an elephant above a toilet.a carrot to the right of an elephant..png	FALSE	FALSE	TRUE
2_103_real_outdoors_a broccoli below a wine glass.a wine glass to the left of a sports ball..png	TRUE	FALSE	FALSE
2_113_real_outdoors_a cake below a sink.a keyboard to the right of a sink..png	TRUE	FALSE	FALSE
2_117_real_outdoors_a mouse above a wine glass.a banana to the right of a mouse..png	FALSE	TRUE	FALSE
2_118_real_outdoors_a toothbrush above a cow.a toothbrush to the left of a scissors..png	FALSE	TRUE	FALSE
2_119_real_outdoors_a spoon above a person.a bench to the right of a spoon..png	TRUE	FALSE	FALSE
2_122_real_outdoors_a truck below a chair.a book to the right of a chair..png	FALSE	FALSE	TRUE
2_126_real_indoors_a skis below a refrigerator.a refrigerator to the left of a keyboard..png	TRUE	FALSE	FALSE
2_128_real_indoors_a pizza below a broccoli.a frisbee to the right of a broccoli..png	TRUE	FALSE	FALSE
2_129_real_indoors_a cow above a horse.a microwave to the right of a cow..png	TRUE	FALSE	FALSE
2_130_real_indoors_a parking meter below a cell phone.a sheep to the right of a cell phone..png	FALSE	FALSE	TRUE
2_141_real_indoors_a giraffe above a broccoli.a giraffe to the left of a banana..png	FALSE	FALSE	TRUE
2_143_real_indoors_an oven above a snowboard.a kite to the right of an oven..png	FALSE	FALSE	TRUE
2_144_real_indoors_a skis below a potted plant.a potted plant to the left of an orange..png	FALSE	FALSE	TRUE
2_164_real_outdoors_a bus above a giraffe.a sink to the left of a giraffe..png	TRUE	FALSE	FALSE
2_165_real_outdoors_a hot dog below a dining table.a laptop to the left of a hot dog..png	FALSE	TRUE	FALSE
2_171_real_outdoors_a cup below a baseball bat.a cup to the right of an airplane..png	TRUE	FALSE	FALSE
2_179_real_indoors_a sink below a sandwich.a sink to the right of a chair..png	FALSE	TRUE	FALSE
2_184_real_indoors_a skis above a spoon.a spoon to the right of an elephant..png	TRUE	FALSE	FALSE
2_187_real_indoors_a refrigerator above a vase.a vase to the right of a frisbee..png	TRUE	FALSE	FALSE
2_188_real_indoors_a bottle below a potted plant.a bottle to the right of an oven..png	TRUE	FALSE	FALSE
2_213_real_indoors_a cake above a fork.a cake to the right of a bicycle..png	TRUE	FALSE	FALSE
2_218_real_indoors_an oven below a chair.a chair to the right of a donut..png	FALSE	FALSE	TRUE
2_228_white_a pizza above a horse.a broccoli to the left of a pizza..png	FALSE	FALSE	TRUE
2_243_white_a laptop below a potted plant.a potted plant to the right of a baseball glove..png	FALSE	FALSE	TRUE
2_251_white_a potted plant below an elephant.an elephant to the left of a kite..png	FALSE	FALSE	TRUE
2_265_white_an umbrella below a frisbee.a frisbee to the left of a chair..png	TRUE	FALSE	FALSE
2_270_white_a couch below an umbrella.an umbrella to the left of a cell phone..png	FALSE	TRUE	FALSE
2_277_real_outdoors_a giraffe above a traffic light.a giraffe to the right of an orange..png	TRUE	FALSE	FALSE
2_280_real_outdoors_a carrot below a surfboard.a laptop to the left of a surfboard..png	FALSE	TRUE	FALSE
2_282_real_outdoors_a frisbee below a book.a book to the right of a dog..png	FALSE	TRUE	FALSE
2_283_real_outdoors_a traffic light below a dog.a dog to the right of a tie..png	FALSE	TRUE	FALSE
2_288_real_outdoors_a baseball glove below a surfboard.a surfboard to the right of a bench..png	FALSE	FALSE	TRUE
2_290_real_outdoors_a bicycle below a bench.a truck to the left of a bench..png	FALSE	TRUE	FALSE
2_299_real_outdoors_a scissors below a mouse.a sandwich to the left of a mouse..png	FALSE	TRUE	FALSE
control_0_13_white_a backpack above a wine glass.a wine glass to the left of a sports ball..png	FALSE	TRUE	FALSE
control_0_16_white_a dining table below a snowboard.a dining table to the left of a sandwich..png	FALSE	FALSE	TRUE
control_0_17_white_a bed below a donut.an orange to the right of a bed..png	FALSE	FALSE	TRUE
control_0_23_white_a backpack below a skateboard.a bus to the right of a backpack..png	FALSE	FALSE	TRUE
control_0_31_real_indoors_a handbag above a bus.a bus to the left of a stop sign..png	FALSE	FALSE	TRUE
control_0_37_real_indoors_a sheep above a dog.a bicycle to the right of a dog..png	FALSE	FALSE	TRUE
control_0_42_real_indoors_a knife above a cake.a cake to the left of an apple..png	TRUE	FALSE	FALSE
control_0_52_white_a teddy bear above a motorcycle.a motorcycle to the right of a baseball bat..png	FALSE	FALSE	TRUE
control_0_53_white_a mouse below a parking meter.a cat to the left of a mouse..png	FALSE	TRUE	FALSE
control_0_58_white_a cup below a toaster.a teddy bear to the left of a cup..png	FALSE	FALSE	TRUE
control_0_63_white_a stop sign below a potted plant.a stop sign to the right of a cup..png	FALSE	FALSE	TRUE
control_0_65_white_a sheep above a handbag.a remote to the left of a handbag..png	FALSE	FALSE	TRUE
control_0_86_real_outdoors_a sandwich below a skis.a broccoli to the right of a sandwich..png	FALSE	FALSE	TRUE
control_0_87_real_outdoors_a toilet above an elephant.a couch to the right of an elephant..png	FALSE	FALSE	TRUE
control_0_88_real_outdoors_a bus below a person.a bus to the left of a cat..png	FALSE	FALSE	TRUE
control_0_107_real_outdoors_a laptop below a broccoli.a broccoli to the left of a bowl..png	FALSE	FALSE	TRUE
control_0_109_real_outdoors_a tv below a toothbrush.a toothbrush to the left of a skis..png	FALSE	FALSE	TRUE
control_0_112_real_outdoors_a vase above a boat.a zebra to the right of a vase..png	FALSE	FALSE	TRUE
control_0_114_real_outdoors_a refrigerator above a spoon.a refrigerator to the left of a frisbee..png	FALSE	FALSE	TRUE
control_0_135_real_indoors_a toaster above a skateboard.a toaster to the left of a potted plant..png	FALSE	FALSE	TRUE
control_0_136_real_indoors_a mouse above a skateboard.a sports ball to the right of a mouse..png	FALSE	FALSE	TRUE
control_0_145_real_indoors_a cup above a wine glass.a boat to the right of a cup..png	FALSE	FALSE	TRUE
control_0_146_real_indoors_a book below a kite.a toilet to the right of a kite..png	FALSE	TRUE	FALSE
control_0_170_real_outdoors_a cup above a toaster.a skis to the left of a toaster..png	FALSE	FALSE	TRUE
control_0_174_real_outdoors_a cow below a couch.a cow to the right of a tennis racket..png	FALSE	FALSE	TRUE
control_0_175_real_indoors_a dog above a toothbrush.a wine glass to the left of a toothbrush..png	FALSE	FALSE	TRUE
control_0_180_real_indoors_a bear below an orange.a refrigerator to the left of a bear..png	FALSE	FALSE	TRUE
control_0_184_real_indoors_a skis above a spoon.a spoon to the right of an elephant..png	FALSE	FALSE	TRUE
control_0_185_real_indoors_a teddy bear below a fork.a cow to the left of a teddy bear..png	FALSE	FALSE	TRUE
control_0_191_real_indoors_a sandwich above a knife.a knife to the right of a bird..png	FALSE	FALSE	TRUE
control_0_194_real_indoors_a dining table above a tennis racket.a tennis racket to the right of a microwave..png	FALSE	FALSE	TRUE
control_0_196_real_indoors_a sheep below a toothbrush.a sheep to the right of an apple..png	FALSE	TRUE	FALSE
control_0_204_real_indoors_a vase above a skis.a parking meter to the left of a vase..png	FALSE	TRUE	FALSE
control_0_205_real_indoors_a wine glass above a snowboard.a clock to the left of a wine glass..png	FALSE	TRUE	FALSE
control_0_212_real_indoors_a bowl below a car.a laptop to the left of a car..png	FALSE	FALSE	TRUE
control_0_219_real_indoors_a truck above a sandwich.a truck to the right of a cake..png	FALSE	FALSE	TRUE
control_0_226_white_a horse below a bus.a bus to the right of a tennis racket..png	FALSE	FALSE	TRUE
control_0_233_white_a toaster below a car.a traffic light to the left of a car..png	FALSE	FALSE	TRUE
control_0_235_white_a boat below a wine glass.a keyboard to the left of a wine glass..png	FALSE	TRUE	FALSE
control_0_237_white_a baseball bat above a handbag.a baseball bat to the right of a pizza..png	TRUE	FALSE	FALSE
control_0_238_white_a teddy bear below an apple.an apple to the right of a motorcycle..png	FALSE	FALSE	TRUE
control_0_244_white_a book below a chair.an orange to the left of a chair..png	FALSE	FALSE	TRUE
control_0_263_white_a cup above a tennis racket.a cup to the left of a train..png	FALSE	FALSE	TRUE
control_0_274_white_a sports ball above a bottle.a sports ball to the left of a surfboard..png	FALSE	FALSE	TRUE
control_0_275_real_outdoors_a refrigerator below a keyboard.a keyboard to the right of a remote..png	FALSE	FALSE	TRUE
control_0_289_real_outdoors_a toaster above a cat.a toaster to the right of a mouse..png	FALSE	FALSE	TRUE
control_0_291_real_outdoors_a baseball glove below a sandwich.a tennis racket to the left of a sandwich..png	FALSE	TRUE	FALSE
control_0_292_real_outdoors_a zebra below a cow.a cow to the right of a laptop..png	FALSE	FALSE	TRUE
control_0_293_real_outdoors_a bed below a fire hydrant.a fire hydrant to the right of a carrot..png	FALSE	FALSE	TRUE
	FALSE	FALSE	FALSE
	FALSE	FALSE	FALSE
	FALSE	FALSE	FALSE
	FALSE	FALSE	FALSE
	FALSE	FALSE	FALSE
	FALSE	FALSE	FALSE
	FALSE	FALSE	FALSE
	FALSE	FALSE	FALSE
	FALSE	FALSE	FALSE
	FALSE	FALSE	FALSE
	FALSE	FALSE	FALSE
	FALSE	FALSE	FALSE
	FALSE	FALSE	FALSE
	FALSE	FALSE	FALSE
	FALSE	FALSE	FALSE
	FALSE	FALSE	FALSE
	FALSE	FALSE	FALSE
	FALSE	FALSE	FALSE
	FALSE	FALSE	FALSE
	FALSE	FALSE	FALSE
	FALSE	FALSE	FALSE
	FALSE	FALSE	FALSE
	FALSE	FALSE	FALSE
	FALSE	FALSE	FALSE
	FALSE	FALSE	FALSE
	FALSE	FALSE	FALSE
	FALSE	FALSE	FALSE
	FALSE	FALSE	FALSE
	FALSE	FALSE	FALSE
	FALSE	FALSE	FALSE
	FALSE	FALSE	FALSE
	FALSE	FALSE	FALSE
	FALSE	FALSE	FALSE
	FALSE	FALSE	FALSE
	FALSE	FALSE	FALSE
	FALSE	FALSE	FALSE
	FALSE	FALSE	FALSE
	FALSE	FALSE	FALSE
	FALSE	FALSE	FALSE
	FALSE	FALSE	FALSE
	FALSE	FALSE	FALSE
	FALSE	FALSE	FALSE
	FALSE	FALSE	FALSE
	FALSE	FALSE	FALSE
	FALSE	FALSE	FALSE
	FALSE	FALSE	FALSE
	FALSE	FALSE	FALSE
	FALSE	FALSE	FALSE
	FALSE	FALSE	FALSE
	FALSE	FALSE	FALSE
	FALSE	FALSE	FALSE
	FALSE	FALSE	FALSE
	FALSE	FALSE	FALSE
	FALSE	FALSE	FALSE
	FALSE	FALSE	FALSE
	FALSE	FALSE	FALSE
	FALSE	FALSE	FALSE
	FALSE	FALSE	FALSE
	FALSE	FALSE	FALSE
	FALSE	FALSE	FALSE
	FALSE	FALSE	FALSE
	FALSE	FALSE	FALSE
	FALSE	FALSE	FALSE
	FALSE	FALSE	FALSE
	FALSE	FALSE	FALSE
	FALSE	FALSE	FALSE
	FALSE	FALSE	FALSE
	FALSE	FALSE	FALSE
	FALSE	FALSE	FALSE
	FALSE	FALSE	FALSE
	FALSE	FALSE	FALSE
	FALSE	FALSE	FALSE
	FALSE	FALSE	FALSE
	FALSE	FALSE	FALSE
	FALSE	FALSE	FALSE
	FALSE	FALSE	FALSE
	FALSE	FALSE	FALSE
	FALSE	FALSE	FALSE
	FALSE	FALSE	FALSE
	FALSE	FALSE	FALSE
	FALSE	FALSE	FALSE
	FALSE	FALSE	FALSE
	FALSE	FALSE	FALSE
	FALSE	FALSE	FALSE
	FALSE	FALSE	FALSE
	FALSE	FALSE	FALSE
	FALSE	FALSE	FALSE
	FALSE	FALSE	FALSE
	FALSE	FALSE	FALSE
	FALSE	FALSE	FALSE
	FALSE	FALSE	FALSE
	FALSE	FALSE	FALSE
	FALSE	FALSE	FALSE
	FALSE	FALSE	FALSE
	FALSE	FALSE	FALSE
	FALSE	FALSE	FALSE
	FALSE	FALSE	FALSE
	FALSE	FALSE	FALSE
	FALSE	FALSE	FALSE
	FALSE	FALSE	FALSE
	FALSE	FALSE	FALSE
	FALSE	FALSE	FALSE
	FALSE	FALSE	FALSE
	FALSE	FALSE	FALSE
	FALSE	FALSE	FALSE
	FALSE	FALSE	FALSE
	FALSE	FALSE	FALSE
	FALSE	FALSE	FALSE
	FALSE	FALSE	FALSE
	FALSE	FALSE	FALSE
	FALSE	FALSE	FALSE
	FALSE	FALSE	FALSE
	FALSE	FALSE	FALSE
	FALSE	FALSE	FALSE
	FALSE	FALSE	FALSE
	FALSE	FALSE	FALSE
	FALSE	FALSE	FALSE
	FALSE	FALSE	FALSE
	FALSE	FALSE	FALSE
	FALSE	FALSE	FALSE
	FALSE	FALSE	FALSE
	FALSE	FALSE	FALSE
	FALSE	FALSE	FALSE
	FALSE	FALSE	FALSE
	FALSE	FALSE	FALSE
	FALSE	FALSE	FALSE
	FALSE	FALSE	FALSE
	FALSE	FALSE	FALSE
	FALSE	FALSE	FALSE
	FALSE	FALSE	FALSE
	FALSE	FALSE	FALSE
	FALSE	FALSE	FALSE
	FALSE	FALSE	FALSE
	FALSE	FALSE	FALSE
	FALSE	FALSE	FALSE
	FALSE	FALSE	FALSE
	FALSE	FALSE	FALSE
	FALSE	FALSE	FALSE
	FALSE	FALSE	FALSE
	FALSE	FALSE	FALSE
	FALSE	FALSE	FALSE
	FALSE	FALSE	FALSE
	FALSE	FALSE	FALSE
	FALSE	FALSE	FALSE
	FALSE	FALSE	FALSE
	FALSE	FALSE	FALSE
	FALSE	FALSE	FALSE
	FALSE	FALSE	FALSE
	FALSE	FALSE	FALSE
	FALSE	FALSE	FALSE
	FALSE	FALSE	FALSE
	FALSE	FALSE	FALSE
	FALSE	FALSE	FALSE
	FALSE	FALSE	FALSE
	FALSE	FALSE	FALSE
	FALSE	FALSE	FALSE
	FALSE	FALSE	FALSE
	FALSE	FALSE	FALSE
	FALSE	FALSE	FALSE
	FALSE	FALSE	FALSE
	FALSE	FALSE	FALSE
	FALSE	FALSE	FALSE
	FALSE	FALSE	FALSE
	FALSE	FALSE	FALSE
	FALSE	FALSE	FALSE
	FALSE	FALSE	FALSE
	FALSE	FALSE	FALSE
	FALSE	FALSE	FALSE
	FALSE	FALSE	FALSE
	FALSE	FALSE	FALSE
	FALSE	FALSE	FALSE
	FALSE	FALSE	FALSE
	FALSE	FALSE	FALSE
	FALSE	FALSE	FALSE
	FALSE	FALSE	FALSE
	FALSE	FALSE	FALSE
	FALSE	FALSE	FALSE
	FALSE	FALSE	FALSE
	FALSE	FALSE	FALSE
	FALSE	FALSE	FALSE
	FALSE	FALSE	FALSE
	FALSE	FALSE	FALSE
	FALSE	FALSE	FALSE
	FALSE	FALSE	FALSE
	FALSE	FALSE	FALSE
	FALSE	FALSE	FALSE
	FALSE	FALSE	FALSE
	FALSE	FALSE	FALSE
	FALSE	FALSE	FALSE
	FALSE	FALSE	FALSE
	FALSE	FALSE	FALSE
	FALSE	FALSE	FALSE
	FALSE	FALSE	FALSE
	FALSE	FALSE	FALSE
	FALSE	FALSE	FALSE
	FALSE	FALSE	FALSE
	FALSE	FALSE	FALSE
	FALSE	FALSE	FALSE

## Sheet: ood
Image Name	Results		Errors
	0	1		Total:	114
control_0_a baseball bat to the left of a boxing glove.png	FALSE	TRUE
control_0_a baseball bat to the left of a crane.png	FALSE	TRUE
control_0_a bed to the right of a rabbit.png	FALSE	TRUE
control_0_a boat to the left of a barstool.png	FALSE	TRUE
control_0_a boat to the left of a pitcher.png	FALSE	TRUE
control_0_a bowtie to the left of a baseball bat.png	TRUE	FALSE
control_0_a boxing glove to the right of a fire hydrant.png	FALSE	TRUE
control_0_a burger to the right of a truck.png	TRUE	FALSE
control_0_a butterfly to the left of a frisbee.png	TRUE	FALSE
control_0_a cabinet to the left of a tv.png	FALSE	TRUE
control_0_a camel to the right of a clock.png	FALSE	TRUE
control_0_a cauliflower above a surfboard.png	FALSE	TRUE
control_0_a chair below a salad.png	FALSE	TRUE
control_0_a computer monitor above a sink.png	FALSE	TRUE
control_0_a couch to the left of a bowtie.png	TRUE	FALSE
control_0_a fire hydrant to the right of a scooter.png	FALSE	TRUE
control_0_a giraffe below a sword.png	FALSE	TRUE
control_0_a giraffe to the right of a ambulance.png	TRUE	FALSE
control_0_a goat to the right of a suitcase.png	TRUE	FALSE
control_0_a kayak below a pizza.png	FALSE	TRUE
control_0_a llama below a hair drier.png	FALSE	TRUE
control_0_a lunchbox above a backpack.png	FALSE	TRUE
control_0_a rabbit to the left of a hot dog.png	FALSE	TRUE
control_0_a sofa above a horse.png	FALSE	TRUE
control_0_a spoon to the left of a pudding.png	FALSE	TRUE
control_0_a spoon to the right of a tumbler.png	TRUE	FALSE
control_0_a straw to the left of a donut.png	TRUE	FALSE
control_0_a sword above a mouse.png	FALSE	TRUE
control_0_a traffic light above a cauliflower.png	FALSE	TRUE
control_0_a traffic light above a Sled.png	FALSE	TRUE
control_0_a tree above a skis.png	FALSE	TRUE
control_0_a tv above a magazine.png	FALSE	TRUE
control_0_a waffle maker to the left of a mouse.png	TRUE	FALSE
control_0_an dishwasher below a hair drier.png	FALSE	TRUE
control_0_an helicopter above a toilet.png	TRUE	FALSE
control_0_an tent below a surfboard.png	TRUE	FALSE
control_1_a badminton racket below an orange.png	FALSE	TRUE
control_1_a banana below an pear.png	TRUE	FALSE
control_1_a barstool below a tennis racket.png	FALSE	TRUE
control_1_a bed above a landline phone.png	FALSE	TRUE
control_1_a boat to the left of a pitcher.png	FALSE	TRUE
control_1_a book below an lion.png	FALSE	TRUE
control_1_a bottle to the right of a piano.png	TRUE	FALSE
control_1_a bowtie to the left of a baseball bat.png	FALSE	TRUE
control_1_a butterfly to the left of a frisbee.png	FALSE	TRUE
control_1_a cardboard box to the left of a dog.png	FALSE	TRUE
control_1_a cell phone to the right of a mailbox.png	FALSE	TRUE
control_1_a cushion below a laptop.png	FALSE	TRUE
control_1_a fire hydrant above a piano.png	TRUE	FALSE
control_1_a fire hydrant to the right of a scooter.png	FALSE	TRUE
control_1_a game controller below a train.png	FALSE	TRUE
control_1_a goat to the right of a parking meter.png	FALSE	TRUE
control_1_a handbag to the right of a piano.png	TRUE	FALSE
control_1_a hot dog above a pliers.png	TRUE	FALSE
control_1_a kayak below a pizza.png	FALSE	TRUE
control_1_a kayak to the right of a bottle.png	TRUE	FALSE
control_1_a kite to the right of a straw.png	TRUE	FALSE
control_1_a parking sign above a vase.png	TRUE	FALSE
control_1_a potted plant above an lion.png	TRUE	FALSE
control_1_a purse below a wine glass.png	TRUE	FALSE
control_1_a refrigerator to the left of a computer monitor.png	FALSE	TRUE
control_1_a scooter below a zebra.png	FALSE	TRUE
control_1_a sink to the left of a squirrel.png	TRUE	FALSE
control_1_a sword to the right of an airplane.png	FALSE	TRUE
control_1_a train to the left of an papaya.png	FALSE	TRUE
control_1_a tv above a bathtub.png	TRUE	FALSE
control_1_a wine glass to the left of a shower.png	TRUE	FALSE
control_1_an dishwasher below a backpack.png	FALSE	TRUE
control_1_an orange above a badminton racket.png	FALSE	TRUE
control_1_an oven below a donkey.png	FALSE	TRUE
v1.4_0_a bed below a landline phone.png	FALSE	TRUE
v1.4_0_a chopsticks to the right of a surfboard.png	FALSE	TRUE
v1.4_0_a computer monitor above a book.png	FALSE	TRUE
v1.4_0_a duffel bag above a zebra.png	FALSE	TRUE
v1.4_0_a flag to the left of a cow.png	TRUE	FALSE
v1.4_0_a frisbee to the left of a bowling ball.png	FALSE	TRUE
v1.4_0_a kayak above a handbag.png	TRUE	FALSE
v1.4_0_a landline phone below a giraffe.png	TRUE	FALSE
v1.4_0_a lunchbox above a backpack.png	TRUE	FALSE
v1.4_0_a microwave to the left of a hairbrush.png	TRUE	FALSE
v1.4_0_a motorcycle to the left of a pudding.png	TRUE	FALSE
v1.4_0_a phone booth to the left of a hair drier.png	TRUE	FALSE
v1.4_0_a pudding to the left of a vase.png	TRUE	FALSE
v1.4_0_a rabbit to the left of a hot dog.png	FALSE	TRUE
v1.4_0_a sheep to the right of a duffel bag.png	FALSE	TRUE
v1.4_0_a snowboard above a burrito.png	TRUE	FALSE
v1.4_0_a sports ball above a salad.png	FALSE	TRUE
v1.4_0_a squirrel to the left of a knife.png	FALSE	TRUE
v1.4_0_a surfboard above a cardboard box.png	FALSE	TRUE
v1.4_0_a surfboard below a burger.png	FALSE	TRUE
v1.4_0_a toothbrush to the right of a hockey stick.png	TRUE	FALSE
v1.4_0_a tram below a truck.png	TRUE	FALSE
v1.4_0_a tree above an elephant.png	FALSE	TRUE
v1.4_0_an helicopter above a toilet.png	TRUE	FALSE
v1.4_1_a backpack below a glass jar.png	TRUE	FALSE
v1.4_1_a basketball above a carrot.png	FALSE	TRUE
v1.4_1_a bird above a cabinet.png	FALSE	TRUE
v1.4_1_a bird below an dishwasher.png	FALSE	TRUE
v1.4_1_a book below a plate.png	TRUE	FALSE
v1.4_1_a cat to the right of a camel.png	TRUE	FALSE
v1.4_1_a doll below a tennis racket.png	FALSE	TRUE
v1.4_1_a fire hydrant to the left of a dressing table.png	TRUE	FALSE
v1.4_1_a giraffe below a sword.png	FALSE	TRUE
v1.4_1_a giraffe to the right of a ambulance.png	FALSE	TRUE
v1.4_1_a hair drier above a pie.png	FALSE	TRUE
v1.4_1_a handbag to the left of a fox.png	FALSE	TRUE
v1.4_1_a kayak to the right of a bottle.png	FALSE	TRUE
v1.4_1_a person below a butterfly.png	FALSE	TRUE
v1.4_1_a rabbit to the right of a giraffe.png	TRUE	FALSE
v1.4_1_a sheep below an papaya.png	FALSE	TRUE
v1.4_1_a sink to the left of a pudding.png	FALSE	TRUE
v1.4_1_a straw to the left of a donut.png	TRUE	FALSE
v1.4_1_a submarine to the left of a chair.png	TRUE	FALSE
v1.4_1_a surfboard above a cardboard box.png	FALSE	TRUE
v1.4_1_a surfboard to the left of an pear.png	TRUE	FALSE
v1.4_1_a sweet potato to the left of a baseball bat.png	TRUE	FALSE
v1.4_1_a toaster oven to the left of a hair drier.png	FALSE	TRUE
v1.4_1_a toothbrush above a chopsticks.png	TRUE	FALSE
v1.4_1_a tractor above a backpack.png	FALSE	TRUE
v1.4_1_a tv above a bathtub.png	FALSE	TRUE
v1.4_1_a waffle maker to the left of a mouse.png	TRUE	FALSE
v1.4_1_a wine glass to the left of a shower.png	TRUE	FALSE
v1.4_1_an apple below a mannequin.png	FALSE	TRUE
v1.4_1_an pear below a boat.png	TRUE	FALSE
v1.5_0_a bathtub above a mouse.png	TRUE	FALSE
v1.5_0_a bed above a landline phone.png	TRUE	FALSE
v1.5_0_a bed below a landline phone.png	TRUE	FALSE
v1.5_0_a bed below a tablet.png	FALSE	TRUE
v1.5_0_a bicycle below a parking sign.png	FALSE	TRUE
v1.5_0_a bird above a cabinet.png	FALSE	TRUE
v1.5_0_a boat to the left of a barstool.png	TRUE	FALSE
v1.5_0_a boat to the left of a pitcher.png	TRUE	FALSE
v1.5_0_a bottle to the right of a squirrel.png	FALSE	TRUE
v1.5_0_a bowtie to the left of a baseball bat.png	TRUE	FALSE
v1.5_0_a boxing glove to the right of a fire hydrant.png	FALSE	TRUE
v1.5_0_a cardboard box above a baseball bat.png	FALSE	TRUE
v1.5_0_a comb above a fork.png	TRUE	FALSE
v1.5_0_a couch above a tree.png	FALSE	TRUE
v1.5_0_a couch above an lion.png	FALSE	TRUE
v1.5_0_a crane to the right of a dining table.png	TRUE	FALSE
v1.5_0_a cushion below a laptop.png	FALSE	TRUE
v1.5_0_a dressing table to the left of an airplane.png	TRUE	FALSE
v1.5_0_a fire hydrant to the right of a scooter.png	TRUE	FALSE
v1.5_0_a flag to the right of a spoon.png	TRUE	FALSE
v1.5_0_a game controller below a train.png	TRUE	FALSE
v1.5_0_a giraffe below a sword.png	FALSE	TRUE
v1.5_0_a kayak to the right of a bottle.png	TRUE	FALSE
v1.5_0_a laptop to the right of a ambulance.png	FALSE	TRUE
v1.5_0_a llama to the left of a carrot.png	FALSE	TRUE
v1.5_0_a mannequin below a bird.png	FALSE	TRUE
v1.5_0_a potted plant above a hockey stick.png	FALSE	TRUE
v1.5_0_a refrigerator below a panda.png	TRUE	FALSE
v1.5_0_a remote to the left of an tent.png	TRUE	FALSE
v1.5_0_a sheep to the left of a landline phone.png	TRUE	FALSE
v1.5_0_a snowboard to the left of a waffle maker.png	FALSE	TRUE
v1.5_0_a spoon to the left of a pudding.png	TRUE	FALSE
v1.5_0_a submarine to the left of a couch.png	TRUE	FALSE
v1.5_0_a surfboard above a cardboard box.png	FALSE	TRUE
v1.5_0_a table below a laptop.png	FALSE	TRUE
v1.5_0_a tie above a tumbler.png	TRUE	FALSE
v1.5_0_a toaster to the left of a squirrel.png	TRUE	FALSE
v1.5_0_a tractor to the right of a couch.png	FALSE	TRUE
v1.5_0_an airplane above a monkey.png	TRUE	FALSE
v1.5_0_an pear to the left of a remote.png	FALSE	TRUE
v1.5_1_a bathtub above a mouse.png	TRUE	FALSE
v1.5_1_a bird to the left of an dishwasher.png	FALSE	TRUE
v1.5_1_a boat to the right of a tractor.png	FALSE	TRUE
v1.5_1_a bowling ball to the left of a remote.png	FALSE	TRUE
v1.5_1_a burger below a hair drier.png	FALSE	TRUE
v1.5_1_a bus to the right of a burrito.png	FALSE	TRUE
v1.5_1_a butterfly below an oven.png	FALSE	TRUE
v1.5_1_a cat to the left of a burrito.png	TRUE	FALSE
v1.5_1_a cauliflower above a skateboard.png	FALSE	TRUE
v1.5_1_a chair below a salad.png	TRUE	FALSE
v1.5_1_a computer monitor above a book.png	FALSE	TRUE
v1.5_1_a doll above a remote.png	FALSE	TRUE
v1.5_1_a fire hydrant to the right of a scooter.png	TRUE	FALSE
v1.5_1_a fox to the left of a bench.png	FALSE	TRUE
v1.5_1_a game controller below a train.png	FALSE	TRUE
v1.5_1_a handbag to the left of a cauliflower.png	FALSE	TRUE
v1.5_1_a hockey stick to the right of a bird.png	FALSE	TRUE
v1.5_1_a laptop to the left of a camel.png	FALSE	TRUE
v1.5_1_a lunchbox to the left of a skateboard.png	TRUE	FALSE
v1.5_1_a lunchbox to the right of a mouse.png	TRUE	FALSE
v1.5_1_a motorcycle to the left of a pudding.png	TRUE	FALSE
v1.5_1_a motorcycle to the right of a cushion.png	FALSE	TRUE
v1.5_1_a rabbit to the right of a giraffe.png	TRUE	FALSE
v1.5_1_a scooter below a cup.png	FALSE	TRUE
v1.5_1_a sheep to the right of a duffel bag.png	FALSE	TRUE
v1.5_1_a straw below a book.png	TRUE	FALSE
v1.5_1_a surfboard to the right of a lunchbox.png	TRUE	FALSE
v1.5_1_a sweet potato to the right of a traffic light.png	TRUE	FALSE
v1.5_1_a table below a laptop.png	TRUE	FALSE
v1.5_1_a tennis racket below an papaya.png	FALSE	TRUE
v1.5_1_a tie below a streetlight.png	TRUE	FALSE
v1.5_1_a toothbrush above a chopsticks.png	TRUE	FALSE
v1.5_1_a train below a crane.png	TRUE	FALSE
v1.5_1_a tram to the left of an elephant.png	FALSE	TRUE
v1.5_1_a walking stick to the left of a truck.png	FALSE	TRUE
v1.5_1_an airplane above a shower.png	TRUE	FALSE
